# Supplementary material for: A systematic review and meta-analyses of interleukin-1 receptor associated kinase 3 (IRAK3) action on inflammation in in vivo models for the study of sepsis
Source: PLOS journal article supplement (doi:10.1371/journal.pone.0263968), 2022-02-15
Supplement: S3 (10.1371/journal.pone.0263968.s003) [file journal.pone.0263968.s003]

**S1 Table. Characteristics of included studies.**

| No                                  | Study                         | Sample size                          | Treatment                         | Intervention duration                                             | Comparison groups                                                                                                                                                                                                                                  | Outcome measure of interest                                                                                                                                                    | Effect sizes                                                                                                                                                                                                                                                                                                                                                                        |
|-------------------------------------|-------------------------------|--------------------------------------|-----------------------------------|-------------------------------------------------------------------|----------------------------------------------------------------------------------------------------------------------------------------------------------------------------------------------------------------------------------------------------|--------------------------------------------------------------------------------------------------------------------------------------------------------------------------------|-------------------------------------------------------------------------------------------------------------------------------------------------------------------------------------------------------------------------------------------------------------------------------------------------------------------------------------------------------------------------------------|
| <b>Human <i>in vivo</i> studies</b> |                               |                                      |                                   |                                                                   |                                                                                                                                                                                                                                                    |                                                                                                                                                                                |                                                                                                                                                                                                                                                                                                                                                                                     |
| 1                                   | de Kruif <i>et al.</i> (2007) | Human healthy male subjects (n = 8)  | Administration with LPS (4 ng/kg) | 1.5h<br>4h<br>24h<br>3h<br>4h                                     | Group 1: One-challenge<br>Group 2: Control<br><br>Group 1: One-challenge<br>Group 2: Control<br><br>Group 1: One-challenge<br>Group 2: Control<br><br>Group 1: One-challenge<br>Group 2: Control<br><br>Group 1: One-challenge<br>Group 2: Control | TNF- $\alpha$ protein expression<br><br>TNF- $\alpha$ protein expression<br><br>TNF- $\alpha$ protein expression<br><br>IL-6 protein expression<br><br>IL-6 protein expression | (Positive favours one-challenge)<br>TNF- $\alpha$ protein expression: 1.42 (0.29, 2.95)<br>TNF- $\alpha$ protein expression: 0.00 (-0.98, 0.98)<br>TNF- $\alpha$ protein expression: 0.00 (-0.98, 0.98)<br><br>(Positive favours one-challenge)<br>IL-6 protein expression: 1.21 (0.11, 2.30)<br><br>(Positive favours one-challenge)<br>IL-6 protein expression: 1.25 (0.15, 2.35) |
| 2                                   | De Vox <i>et al.</i> (2009)   | Human healthy male subjects (n = 6)  | Administration with LPS (4 ng/kg) | 1.5h<br>4h<br>1h-2h (1 <sup>st</sup> ),<br>24h (2 <sup>nd</sup> ) | Group 1: One-challenge<br>Group 2: Control<br><br>Group 1: One-challenge<br>Group 2: Control<br><br>Group 1: Two-challenges<br>Group 2: One-challenge                                                                                              | TNF- $\alpha$ protein expression<br><br>TNF- $\alpha$ protein expression<br><br>TNF- $\alpha$ protein expression<br><br>IL-6 protein expression                                | (Positive favours one-challenge)<br>TNF- $\alpha$ protein expression: 1.51 (0.16, 2.86)<br>TNF- $\alpha$ protein expression: 0.00 (-1.13, 1.13)<br>(Negative favours one-challenge)<br>TNF- $\alpha$ protein expression: -0.25 (-1.38, 0.89)<br>(Negative favours one-challenge)<br>IL-6 protein expression: -0.35 (-1.50, 0.79)                                                    |
| 3                                   | Draisma <i>et al.</i> (2009)  | Human healthy male subjects (n = 14) | Administration with LPS (2 ng/kg) | 1.5h<br>4h<br>1.5h                                                | Group 1: One-challenge<br>Group 2: Control<br><br>Group 1: One-challenge<br>Group 2: Control<br><br>Group 1: One-challenge<br>Group 2: Control                                                                                                     | TNF- $\alpha$ protein expression<br><br>TNF- $\alpha$ protein expression<br><br>IL-6 protein expression                                                                        | (Positive favours one-challenge)<br>TNF- $\alpha$ protein expression: 4.01 (2.65, 5.36)<br>(Positive favours one-challenge)<br>TNF- $\alpha$ protein expression: 0.00 (-0.74, 0.74)<br>(Positive favours one-challenge)<br>IL-6 protein expression: 2.97 (1.85, 4.09)                                                                                                               |

|   |                                 |                                      |                                                                                                                           |                                                                                              |                                                                                                                                                                                                                                 |                                                                                                                                                                                |                                                                                                                                                                                                                                                                                                                                                                                             |
|---|---------------------------------|--------------------------------------|---------------------------------------------------------------------------------------------------------------------------|----------------------------------------------------------------------------------------------|---------------------------------------------------------------------------------------------------------------------------------------------------------------------------------------------------------------------------------|--------------------------------------------------------------------------------------------------------------------------------------------------------------------------------|---------------------------------------------------------------------------------------------------------------------------------------------------------------------------------------------------------------------------------------------------------------------------------------------------------------------------------------------------------------------------------------------|
|   |                                 |                                      |                                                                                                                           | 4h<br><br>1h (1 <sup>st</sup> ), 2h (2 <sup>nd</sup> )                                       | Group 1: One-challenge<br>Group 2: Control<br><br>Group 1: Two-challenges<br>Group 2: One-challenge                                                                                                                             | IL-6 protein expression<br><br>TNF- $\alpha$ protein expression<br><br>IL-6 protein expression                                                                                 | (Positive favours one-challenge)<br>IL-6 protein expression: 0.88 (0.10, 1.66)<br>(Negative favours one-challenge)<br>TNF- $\alpha$ protein expression: -0.91 (-1.69, -0.12)<br>(Negative favours one-challenge)<br>IL-6 protein expression: -2.29 (-3.28, -1.31)                                                                                                                           |
| 4 | Grondman <i>et al.</i> (2019)   | Human healthy male subjects (n = 15) | Administration with LPS (2 ng/kg) (1 <sup>st</sup> ); ex vivo monocytes stimulated with LPS (10 ng/ml) (2 <sup>nd</sup> ) | 4h or 7d (1 <sup>st</sup> ); 24h (2 <sup>nd</sup> )                                          | Group 1: Two-challenges<br>Group 2: One-challenge                                                                                                                                                                               | TNF- $\alpha$ protein expression<br><br>IL-6 protein expression                                                                                                                | Not estimable<br><br>Not estimable                                                                                                                                                                                                                                                                                                                                                          |
| 5 | Hoogerwerf <i>et al.</i> (2008) | Human healthy male subjects (n = 8)  | Bronchial instillation of LPS (4 ng/kg)                                                                                   | 6h                                                                                           | Group 1: One-challenge<br>Group 2: Control                                                                                                                                                                                      | IRAK3 mRNA expression                                                                                                                                                          | (Positive favours one-challenge)<br>IRAK3 mRNA expression: 0.70 (-0.32, 1.72)                                                                                                                                                                                                                                                                                                               |
| 6 | Koch <i>et al.</i> (2017)       | Human healthy male subjects (n = 15) | Administration with LPS (2 ng/kg)                                                                                         | 0, 1, 1.5, 2, 3, 4, 5, 6, 7, 8h                                                              | Group 1: One-challenge<br>Group 2: Control                                                                                                                                                                                      | TNF- $\alpha$ protein expression<br>IL-6 protein expression                                                                                                                    | Not estimable                                                                                                                                                                                                                                                                                                                                                                               |
| 7 | Kox <i>et al.</i> (2011)        | Human healthy male subjects (n = 12) | Administration with LPS (4 ng/kg)                                                                                         | 1.5h<br><br>4h<br><br>1.5h<br><br>4h<br><br>1.5h (1 <sup>st</sup> ), 1.5h (2 <sup>nd</sup> ) | Group 1: One-challenge<br>Group 2: Control<br><br>Group 1: One-challenge<br>Group 2: Control<br><br>Group 1: One-challenge<br>Group 2: Control<br><br>Group 1: One-challenge<br>Group 2: Control<br><br>Group 1: Two-challenges | TNF- $\alpha$ protein expression<br><br>TNF- $\alpha$ protein expression<br><br>IL-6 protein expression<br><br>IL-6 protein expression<br><br>TNF- $\alpha$ protein expression | (Positive favours one-challenge)<br>TNF- $\alpha$ protein expression: 1.46 (0.54, 2.38)<br>(Positive favours one-challenge)<br>TNF- $\alpha$ protein expression: 2.79 (1.62, 3.97)<br>(Positive favours one-challenge)<br>IL-6 protein expression: 2.06 (1.03, 3.08)<br>(Positive favours one-challenge)<br>IL-6 protein expression: 0.73 (-0.10, 1.56)<br>(Negative favours one-challenge) |

|    |                                |                                      |                                   |                                                                                                    |                                                                                                                                                                                                         |                                                                                                                                                                                                           |                                                                                                                                                                                                                                                                                                                                                                                                                                                                                          |
|----|--------------------------------|--------------------------------------|-----------------------------------|----------------------------------------------------------------------------------------------------|---------------------------------------------------------------------------------------------------------------------------------------------------------------------------------------------------------|-----------------------------------------------------------------------------------------------------------------------------------------------------------------------------------------------------------|------------------------------------------------------------------------------------------------------------------------------------------------------------------------------------------------------------------------------------------------------------------------------------------------------------------------------------------------------------------------------------------------------------------------------------------------------------------------------------------|
|    |                                |                                      | Administration with LPS (4 ng/kg) |                                                                                                    | Group 2: One-challenge                                                                                                                                                                                  | IL-6 protein expression                                                                                                                                                                                   | TNF- $\alpha$ protein expression: -0.94 (-1.79, -0.09)<br>(Negative favours one-challenge)<br>IL-6 protein expression: -1.18 (-2.06, -0.30)                                                                                                                                                                                                                                                                                                                                              |
| 8  | Lankelma <i>et al.</i> (2017)  | Human healthy male subjects (n = 8)  | Administration with LPS (4 ng/kg) | 1.5h<br>4h<br>2h<br>4h                                                                             | Group 1: One-challenge<br>Group 2: Control<br><br>Group 1: One-challenge<br>Group 2: Control<br><br>Group 1: One-challenge<br>Group 2: Control<br><br>Group 1: One-challenge<br>Group 2: Control        | TNF- $\alpha$ protein expression<br><br>TNF- $\alpha$ protein expression<br><br>IL-6 protein expression<br><br>IL-6 protein expression                                                                    | (Positive favours one-challenge)<br>TNF- $\alpha$ protein expression: 0.70 (-0.32, 1.72)<br>TNF- $\alpha$ protein expression: 0.00 (-0.98, 0.98)<br><br>(Positive favours one-challenge)<br>IL-6 protein expression: 0.90 (-0.14, 1.95)<br>(Positive favours one-challenge)<br>IL-6 protein expression: 0.77 (-0.25, 1.80)                                                                                                                                                               |
| 9  | Leentjens <i>et al.</i> (2012) | Human healthy male subjects (n = 6)  | Administration with LPS (2 ng/kg) | 0, 2, 4, 6, 8, 24h<br>0, 2, 4, 6, 8, 24h (1 <sup>st</sup> ); 0, 2, 4, 6, 8, 24h (2 <sup>nd</sup> ) | Group 1: One-challenge<br>Group 2: Control<br>Group 1: Two-challenges<br>Group 2: One-challenge                                                                                                         | TNF- $\alpha$ protein expression<br>IL-6 protein expression<br>TNF- $\alpha$ protein expression<br>IL-6 protein expression                                                                                | Not estimable<br><br>Not estimable                                                                                                                                                                                                                                                                                                                                                                                                                                                       |
| 10 | Leijte <i>et al.</i> (2018)    | Human healthy male subjects (n = 10) | Administration with LPS           | 2.5h<br>4h<br>2.5h<br>4h<br>2.5h (1 <sup>st</sup> ), 3h (2 <sup>nd</sup> )                         | Group 1: One-challenge<br>Group 2: Control<br><br>Group 1: One-challenge<br>Group 2: Control<br><br>Group 1: One-challenge<br>Group 2: Control<br><br>Group 1: Two-challenges<br>Group 2: One-challenge | TNF- $\alpha$ protein expression<br><br>TNF- $\alpha$ protein expression<br><br>IL-6 protein expression<br><br>IL-6 protein expression<br><br>TNF- $\alpha$ protein expression<br>IL-6 protein expression | (Positive favours one-challenge)<br>TNF- $\alpha$ protein expression: 5.30 (3.27, 7.33)<br>(Positive favours one-challenge)<br>TNF- $\alpha$ protein expression: 2.96 (1.62, 4.31)<br>(Positive favours one-challenge)<br>IL-6 protein expression: 1.86 (0.83, 2.90)<br>(Positive favours one-challenge)<br>IL-6 protein expression: 1.40 (0.40, 2.41)<br>(Negative favours one-challenge)<br>TNF- $\alpha$ protein expression: -1.24 (-2.21, -0.26)<br>(Negative favours one-challenge) |

[illegible]

|   |                                 |                                 |                                                                                                                                                                                                                                                                                                                                                                                          |                                                                                                                                                                                          |                                                                                                                                                                                                                                                                                                 |                                                                                                                                                                                                                 |                                                                                                                                                                                                                                                                                                                                                                                                                                                                                                 |
|---|---------------------------------|---------------------------------|------------------------------------------------------------------------------------------------------------------------------------------------------------------------------------------------------------------------------------------------------------------------------------------------------------------------------------------------------------------------------------------|------------------------------------------------------------------------------------------------------------------------------------------------------------------------------------------|-------------------------------------------------------------------------------------------------------------------------------------------------------------------------------------------------------------------------------------------------------------------------------------------------|-----------------------------------------------------------------------------------------------------------------------------------------------------------------------------------------------------------------|-------------------------------------------------------------------------------------------------------------------------------------------------------------------------------------------------------------------------------------------------------------------------------------------------------------------------------------------------------------------------------------------------------------------------------------------------------------------------------------------------|
| 1 | Aboyoussef <i>et al.</i> (2021) | Adult male albino rats (n = 10) | Cecal ligation and puncture (CLP)                                                                                                                                                                                                                                                                                                                                                        | 24h                                                                                                                                                                                      | Group 1: One-challenge<br>Group 2: Control                                                                                                                                                                                                                                                      | TNF- $\alpha$ protein expression<br><br>IL-6 protein expression                                                                                                                                                 | (Positive favours one-challenge)<br>TNF- $\alpha$ protein expression: 9.43 (6.05, 12.81)<br>(Positive favours one-challenge)<br>IL-6 protein expression: 10.98 (7.08, 14.88)                                                                                                                                                                                                                                                                                                                    |
| 2 | Berglund <i>et al.</i> (2010)   | C57BL/6 mice (n = 5-10)         | 3% DSS dissolved in tap water for a period of 5d followed by 2d of regular drinking water                                                                                                                                                                                                                                                                                                | 7d                                                                                                                                                                                       | Group 1: IRAK3 knockout<br>Group 2: IRAK3 wildtype                                                                                                                                                                                                                                              | TNF- $\alpha$ and IL-6 mRNA and protein expression                                                                                                                                                              | Not estimable                                                                                                                                                                                                                                                                                                                                                                                                                                                                                   |
| 3 | Deng <i>et al.</i> (2006)       | C57BL/6J mice (n = 5)           | Cecal ligation and puncture (CLP)<br>Inoculation with <i>P. aeruginosa</i><br><br>CLP (1 <sup>st</sup> ); lung macrophages extracted and <i>ex vivo</i> challenged with LPS (1 $\mu$ g/ml) (2 <sup>nd</sup> )<br><br>CLP (1 <sup>st</sup> ), macrophages extracted and <i>ex vivo</i> challenged with LPS (100 ng/ml) (2 <sup>nd</sup> )<br><br>CLP (1 <sup>st</sup> ), inoculation with | 24h<br><br>24h<br><br>6h<br><br>24h (1 <sup>st</sup> ), 6h (2 <sup>nd</sup> )<br><br>24h (1 <sup>st</sup> ), 16h (2 <sup>nd</sup> )<br><br>24h (1 <sup>st</sup> ), 6h (2 <sup>nd</sup> ) | Group 1: One-challenge<br>Group 2: Control<br><br>Group 1: One-challenge<br>Group 2: Control<br><br>Group 1: One-challenge<br>Group 2: Control<br><br>Group 1: Two-challenges<br>Group 2: One-challenge<br><br>Group 1: Two-challenges<br>Group 2: One-challenge<br><br>Group 1: IRAK3 knockout | IRAK3 mRNA expression<br><br>TNF- $\alpha$ protein expression<br><br>TNF- $\alpha$ protein expression<br><br>IRAK3 mRNA expression<br><br>TNF- $\alpha$ protein expression<br><br>TNF- $\alpha$ mRNA expression | (Positive favours one-challenge)<br>IRAK3 mRNA expression: 15.59 (4.78, 26.40)<br>(Positive favours one-challenge)<br>TNF- $\alpha$ protein expression: 2.19 (0.44, 3.93)<br>(Positive favours one-challenge)<br>TNF- $\alpha$ protein expression: 1.70 (0.14, 3.27)<br>(Positive favours two-challenge)<br>IRAK3 mRNA expression: 1.14 (-0.45, 2.73)<br><br>(Negative favours one-challenge)<br>TNF- $\alpha$ protein expression: -1.05 (-2.42, 0.32)<br><br>(Positive favours IRAK3 knockout) |

|   |                                  |                        |                                                                                                                                 |                                                |                                                                                                                                                        |                                                                                                                                        |                                                                                                                                                                                                                                                                                                                                                             |
|---|----------------------------------|------------------------|---------------------------------------------------------------------------------------------------------------------------------|------------------------------------------------|--------------------------------------------------------------------------------------------------------------------------------------------------------|----------------------------------------------------------------------------------------------------------------------------------------|-------------------------------------------------------------------------------------------------------------------------------------------------------------------------------------------------------------------------------------------------------------------------------------------------------------------------------------------------------------|
|   |                                  |                        | <i>P. aeruginosa</i> (2 <sup>nd</sup> )<br><br>CLP (1 <sup>st</sup> ), inoculation with <i>P. aeruginosa</i> (2 <sup>nd</sup> ) | 24h (1 <sup>st</sup> ), 24h (2 <sup>nd</sup> ) | Group 2: IRAK3 wildtype<br><br>Group 1: IRAK3 knockout<br>Group 2: IRAK3 wildtype                                                                      | TNF- $\alpha$ protein expression                                                                                                       | TNF- $\alpha$ mRNA expression: 1.39 (-0.29, 3.07)<br><br>(Positive favours IRAK3 knockout)<br>TNF- $\alpha$ protein expression: 1.49 (0.00, 2.99)                                                                                                                                                                                                           |
| 4 | Funahashi <i>et al.</i> (2019)   | C57BL/6 mice (n = 6-7) | CLP                                                                                                                             | 6h<br><br>24h<br><br>6h<br><br>24h             | Group 1: One-challenge<br>Group 2: Control<br><br><br>Group 1: One-challenge<br>Group 2: Control                                                       | TNF- $\alpha$ protein expression<br><br><br><br>IL-6 protein expression                                                                | (Positive favours one-challenge)<br>TNF- $\alpha$ protein expression: 0.72 (-0.47, 1.90)<br>(Positive favours one-challenge)<br>TNF- $\alpha$ protein expression: 0.56 (-0.56, 1.68)<br>(Positive favours one-challenge)<br>IL-6 protein expression: 2.34 (0.73, 3.95)<br>(Positive favours one-challenge)<br>IL-6 protein expression: 32.07 (18.02, 46.12) |
| 5 | Gandhirajan <i>et al.</i> (2021) | C57BL/6 mice (n = 5)   | Intraperitoneally injected 250 $\mu$ l cecal slurry (CS)-induced sepsis                                                         | 4h, 24h                                        | Group 1: One-challenge<br>Group 2: Control                                                                                                             | TNF- $\alpha$ and IL-6 protein expression                                                                                              | Not estimable                                                                                                                                                                                                                                                                                                                                               |
| 6 | Gong <i>et al.</i> (2017)        | C57BL/6 mice (n = 8)   | Inhalation with LPS (100 $\mu$ g/mL) for 30min                                                                                  | 24h (outcomes measured after challenge)        | Group 1: One-challenge<br>Group 2: Control<br><br>Group 1: One-challenge<br>Group 2: Control<br><br>Group 1: IRAK3 knockout<br>Group 2: IRAK3 wildtype | TNF- $\alpha$ protein expression<br><br>IL-6 protein expression<br><br>TNF- $\alpha$ protein expression<br><br>IL-6 protein expression | (Positive favours one-challenge)<br>TNF- $\alpha$ protein expression: 1.75 (0.55, 2.95)<br>(Positive favours one-challenge)<br>IL-6 protein expression: 6.37 (3.40, 9.35)<br>(Positive favours IRAK3 knockout)<br>TNF- $\alpha$ protein expression: 0.24 (-0.74, 1.23)<br>(Negative favours IRAK3 wildtype)                                                 |

|   |                              |                         |                                                                                                                                                                                                                                            |                                                                              |                                                                                                                                                                                                         |                                                                                                                                                                   |                                                                                                                                                                                                                 |
|---|------------------------------|-------------------------|--------------------------------------------------------------------------------------------------------------------------------------------------------------------------------------------------------------------------------------------|------------------------------------------------------------------------------|---------------------------------------------------------------------------------------------------------------------------------------------------------------------------------------------------------|-------------------------------------------------------------------------------------------------------------------------------------------------------------------|-----------------------------------------------------------------------------------------------------------------------------------------------------------------------------------------------------------------|
|   |                              |                         | Cigarette smoking exposure (1 <sup>st</sup> ), inhalation with LPS (100 µg/mL) for 30min (2 <sup>nd</sup> )                                                                                                                                | 3d (1 <sup>st</sup> ), 24h (2 <sup>nd</sup> )                                | Group 1: IRAK3 knockout<br>Group 2: IRAK3 wildtype                                                                                                                                                      | TNF- $\alpha$ protein expression<br>IL-6 protein expression                                                                                                       | IL-6 protein expression: -0.93 (-2.05, 0.19)<br>Not estimable.                                                                                                                                                  |
| 7 | Gribar <i>et al.</i> (2009)  | C57BL/6 mice (n = 4)    | Injected with LPS (5 mg/kg)                                                                                                                                                                                                                | 3h                                                                           | Group 1: One-challenge<br>Group 2: Control                                                                                                                                                              | IL-6 protein expression                                                                                                                                           | (Positive favours one-challenge)<br>IL-6 protein expression: 4.54 (1.12, 7.96)                                                                                                                                  |
| 8 | Han <i>et al.</i> (2008)     | BALB/c mice (n = 2)     | Injection with 45 mg/kg LPS<br><br>Injection with 15 mg/kg LPS or 300 mg/kg pLTA (1 <sup>st</sup> ), injection with 45 mg/kg LPS (2 <sup>nd</sup> )                                                                                        | 24h<br><br>24h (1 <sup>st</sup> ), 24h (2 <sup>nd</sup> )                    | Group 1: One-challenge<br>Group 2: Control<br><br>Group 1: Two-challenges<br>Group 2: One-challenge                                                                                                     | TNF- $\alpha$ protein expression<br><br>TNF- $\alpha$ protein expression                                                                                          | (Positive favours one-challenge)<br>TNF- $\alpha$ protein expression: 4.78 (-22.33, 31.89)<br>(Negative favours one-challenge)<br>TNF- $\alpha$ protein expression: -3.43 (-22.96, 16.09)                       |
| 9 | Hayashi <i>et al.</i> (2009) | C57BL/6 mice (n = 8-10) | Injection with LPS (2 µg per mouse)<br>Injection with LPS (2 µg per mouse)<br>Injection with 1V136, Pam3CSK4 or pIC<br>Injection with 1V136 (1 <sup>st</sup> ), mice injected with 1V136, Pam3CSK4, pIC, LPS or ISS-ODN (2 <sup>nd</sup> ) | 2h<br><br>2h<br><br>2-3h<br><br>3d (1 <sup>st</sup> ), 2h (2 <sup>nd</sup> ) | Group 1: One-challenge<br>Group 2: Control<br><br>Group 1: One-challenge<br>Group 2: Control<br><br>Group 1: One-challenge<br>Group 2: Control<br><br>Group 1: Two-challenges<br>Group 2: One-challenge | TNF- $\alpha$ protein expression<br><br>IL-6 protein expression<br><br>TNF- $\alpha$ and IL-6 protein expression<br><br>TNF- $\alpha$ and IL-6 protein expression | (Positive favours one-challenge)<br>TNF- $\alpha$ protein expression: 1.60 (0.51, 2.70)<br>(Positive favours one-challenge)<br>IL-6 protein expression: 3.98 (2.24, 5.72)<br>Not estimable<br><br>Not estimable |

|    |                                 |                          |                                                                                                                                                        |                                                        |                                                                                                                                                                                                                                                                                    |                                                                                                                                                                     |                                                                                                                                                                                                                                                                                                                                                                                                                                                               |
|----|---------------------------------|--------------------------|--------------------------------------------------------------------------------------------------------------------------------------------------------|--------------------------------------------------------|------------------------------------------------------------------------------------------------------------------------------------------------------------------------------------------------------------------------------------------------------------------------------------|---------------------------------------------------------------------------------------------------------------------------------------------------------------------|---------------------------------------------------------------------------------------------------------------------------------------------------------------------------------------------------------------------------------------------------------------------------------------------------------------------------------------------------------------------------------------------------------------------------------------------------------------|
| 10 | Hoogerwerf <i>et al.</i> (2012) | C57BL/6 (n = 8)          | Infection with $1 \times 10^4$ CFU of <i>K. pneumoniae</i>                                                                                             | 24h<br>3h<br>3h<br>24h<br>24h                          | Group 1: One-challenge<br>Group 2: Control<br><br>Group 1: IRAK3 knockout<br>Group 2: IRAK3 wildtype<br><br>Group 1: IRAK3 knockout<br>Group 2: IRAK3 wildtype<br><br>Group 1: IRAK3 knockout<br>Group 2: IRAK3 wildtype<br><br>Group 1: IRAK3 knockout<br>Group 2: IRAK3 wildtype | IRAK3 mRNA expression<br><br>TNF- $\alpha$ protein expression<br><br>IL-6 protein expression<br><br>TNF- $\alpha$ protein expression<br><br>IL-6 protein expression | (Positive favours one-challenge)<br>IRAK3 mRNA expression: 2.84 (1.34, 4.34)<br>(Positive favours IRAK3 knockout)<br>TNF- $\alpha$ protein expression: 0.46 (-0.54, 1.45)<br><br>(Positive favours IRAK3 knockout)<br>IL-6 protein expression: 0.57 (-0.43, 1.58)<br><br>(Negative favours IRAK3 wildtype)<br>TNF- $\alpha$ protein expression: -0.65 (-0.54, 1.45)<br><br>(Negative favours IRAK3 wildtype)<br>IL-6 protein expression: -1.68 (-2.86, -0.49) |
| 11 | Kallapur <i>et al.</i> (2007)   | Sheep (n = 5 – 9/ group) | Injection with LPS (10 mg) twice (1 <sup>st</sup> ), lung or blood monocytes extracted and in vitro stimulated with LPS (100 ng/mL) (2 <sup>nd</sup> ) | 2d and 7d (1 <sup>st</sup> )<br>16h (2 <sup>nd</sup> ) | Group 1: Two-challenges<br>Group 2: One-challenge                                                                                                                                                                                                                                  | IRAK3 protein expression                                                                                                                                            | Not estimable                                                                                                                                                                                                                                                                                                                                                                                                                                                 |
| 12 | Kim <i>et al.</i> (2008)        | BALB/c mice (n = 3)      | Injection with 10 – 40 $\mu$ g/mouse CpGDNA<br>Injection with 10 – 40 $\mu$ g/mouse                                                                    | 24h<br>24h (1 <sup>st</sup> ), 6h (2 <sup>nd</sup> )   | Group 1: One-challenge<br>Group 2: Control<br><br>Group 1: Two-challenges<br>Group 2: One-challenge                                                                                                                                                                                | IRAK3 protein expression<br><br>TNF- $\alpha$ and IL-6 protein expression                                                                                           | Not estimable<br><br>Not estimable                                                                                                                                                                                                                                                                                                                                                                                                                            |



|    |                               |                         |                                                                                                                                                                                                              |                                                         |                                                                                                     |                                                                                                                            |                                                                                                                                                                                   |
|----|-------------------------------|-------------------------|--------------------------------------------------------------------------------------------------------------------------------------------------------------------------------------------------------------|---------------------------------------------------------|-----------------------------------------------------------------------------------------------------|----------------------------------------------------------------------------------------------------------------------------|-----------------------------------------------------------------------------------------------------------------------------------------------------------------------------------|
|    |                               |                         | CpGDNA (1 <sup>st</sup> ),<br>CpGDNA (2 <sup>nd</sup> )                                                                                                                                                      |                                                         |                                                                                                     |                                                                                                                            |                                                                                                                                                                                   |
| 13 | Kingsley <i>et al.</i> (2020) | Rats (n = 6)            | Inoculation with 600 CFU of <i>E. coli</i> .                                                                                                                                                                 | 12h                                                     | Group 1: One-challenge<br>Group 2: Control                                                          | TNF- $\alpha$ and IL-6 protein expression                                                                                  | (Positive favours one-challenge)<br>TNF- $\alpha$ protein expression: 3.95 (1.71, 6.78)<br>(Positive favours one-challenge)<br>IL-6 protein expression: 12.22 (6.15, 18.29)       |
| 14 | Krogmann <i>et al.</i> (2020) | C57BL/6J mice (n = 2-4) | Injected mice with 20-100 $\mu$ g R848 (TLR7 ligand)                                                                                                                                                         | 2h                                                      | Group 1: One-challenge<br>Group 2: Control                                                          | IL-6 protein expression                                                                                                    | Not estimable                                                                                                                                                                     |
| 15 | Li <i>et al.</i> (2013)       | BALB/c mice (n = 3-6)   | Injection with LPS (0.2 mg/kg) (1 <sup>st</sup> ), injection with LPS (10 mg/kg) (2 <sup>nd</sup> )                                                                                                          | 24h (1 <sup>st</sup> ), 3h (2 <sup>nd</sup> )           | Group 1: Two-challenges<br>Group 2: One-challenge                                                   | IRAK3 protein expression (n = 3)<br><br>TNF- $\alpha$ protein expression (n = 6)                                           | (Positive favours two-challenge)<br>IRAK3 protein expression: 5.71 (-0.03, 11.45)<br>(Negative favours one-challenge)<br>TNF- $\alpha$ protein expression: -11.99 (-17.95, -6.03) |
| 16 | Li <i>et al.</i> (2016)       | Pig (n = 3)             | Oral administration with <i>E. coli</i> ( $1 \times 10^9$ CFU/kg).<br><br>Diet supplemented with <i>L. acidophilus</i> (1 <sup>st</sup> ), oral administration with <i>E. coli</i> ( $1 \times 10^9$ CFU/kg) | 3h<br><br>14d (1 <sup>st</sup> ), 3h (2 <sup>nd</sup> ) | Group 1: One-challenge<br>Group 2: Control<br><br>Group 1: Two-challenges<br>Group 2: One-challenge | IRAK3 mRNA expression<br>TNF- $\alpha$ protein expression<br><br>IRAK3 mRNA expression<br>TNF- $\alpha$ protein expression | Not estimable<br><br>Not estimable                                                                                                                                                |
| 17 | Lyn-Kew <i>et al.</i> (2010)  | C57BL/6J mice (n = 5)   | CLP                                                                                                                                                                                                          | 24h<br><br>24h                                          | Group 1: One-challenge<br>Group 2: Control<br><br>Group 1: IRAK3 knockout                           | IRAK3 mRNA expression<br><br>TNF- $\alpha$ mRNA expression                                                                 | (Positive favours one-challenge)<br>IRAK3 mRNA expression: 4.29 (-0.15, 8.72)<br>(Positive favours IRAK3 knockout)                                                                |

|    |                                |                            |                                                                                                              |                                                  |                                                                                                                                                                                                                                            |                                                                                                                                   |                                                                                                                                                                                                                                                                                                                                                                                  |
|----|--------------------------------|----------------------------|--------------------------------------------------------------------------------------------------------------|--------------------------------------------------|--------------------------------------------------------------------------------------------------------------------------------------------------------------------------------------------------------------------------------------------|-----------------------------------------------------------------------------------------------------------------------------------|----------------------------------------------------------------------------------------------------------------------------------------------------------------------------------------------------------------------------------------------------------------------------------------------------------------------------------------------------------------------------------|
|    |                                |                            | CLP (1 <sup>st</sup> );<br>pulmonary<br>macrophages<br>extracted and<br>stimulated 1<br>mg/ml LPS (n =<br>3) | 24h (1 <sup>st</sup> ), 4h<br>(2 <sup>nd</sup> ) | Group 2: IRAK3<br>wildtype<br>Group 1: Two-<br>challenges<br>Group 2: One-challenge<br><br>Group 1: IRAK3<br>knockout<br>Group 2: IRAK3<br>wildtype                                                                                        | IRAK3 mRNA expression<br><br>TNF- $\alpha$ mRNA expression                                                                        | TNF- $\alpha$ mRNA expression: 1.16 (-<br>0.24, 2.57)<br>(Positive favours two-challenges)<br>IRAK3 mRNA expression: 4.06 (-<br>0.17, 8.29)<br><br>(Positive favours IRAK3<br>knockout)<br>TNF- $\alpha$ mRNA expression: 1.81<br>(0.20, 3.41)                                                                                                                                   |
| 18 | Miyata <i>et al.</i><br>(2015) | C57BL/6J<br>mice           | Inoculation with<br>1x10 <sup>7</sup> to 5x10 <sup>8</sup><br>CFU of<br><i>Haemophilus<br/>influenzae</i>    | 24h                                              | Group 1: One-challenge<br>Group 2: Control<br><br>Group 1: IRAK3<br>knockout<br>Group 2: IRAK3<br>wildtype<br><br>Group 1: IRAK3<br>knockout<br>Group 2: IRAK3<br>wildtype<br><br>Group 1: IRAK3<br>knockout<br>Group 2: IRAK3<br>wildtype | IRAK3 mRNA expression<br><br>TNF- $\alpha$ mRNA expression<br><br>TNF- $\alpha$ protein expression<br><br>IL-6 protein expression | (Positive favours one-challenge)<br>IRAK3 mRNA expression: 9.61<br>(0.19, 19.03)<br><br>(Positive favours IRAK3<br>knockout)<br>TNF- $\alpha$ mRNA expression: 1.84 (-<br>0.55, 4.23)<br>(Positive favours IRAK3<br>knockout)<br>TNF- $\alpha$ protein expression: 1.74<br>(0.62, 2.87)<br>(Positive favours IRAK3<br>knockout)<br>IL-6 protein expression: 1.73<br>(0.60, 2.85) |
| 19 | Paik <i>et al.</i><br>(2019)   | C57BL/6<br>mice<br>(n = 3) | Administration<br>with LPS (30<br>mg/kg)                                                                     | 18h                                              | Group 1: One-challenge<br>Group 2: Control                                                                                                                                                                                                 | TNF- $\alpha$ protein expression<br><br>IL-6 protein expression                                                                   | (Positive favours one-challenge)<br>TNF- $\alpha$ protein expression: 16.86<br>(0.50, 33.22)<br>(Positive favours one-challenge)<br>IL-6 protein expression: 6.35<br>(0.01, 12.69)                                                                                                                                                                                               |
| 20 | Petzl <i>et al.</i><br>(2012)  | Cow                        | Inoculation with<br><i>E. coli.</i>                                                                          | 24h                                              | Group 1: One-challenge<br>Group 2: Control                                                                                                                                                                                                 | IRAK3 mRNA expression                                                                                                             | Not estimable                                                                                                                                                                                                                                                                                                                                                                    |

|    |                                  |                      |                                                                                              |                                                        |                                                                                                                                                                                                                                                                                              |                                                                                                                                                                              |                                                                                                                                                                                                                                                                                                                                                                                                                                         |
|----|----------------------------------|----------------------|----------------------------------------------------------------------------------------------|--------------------------------------------------------|----------------------------------------------------------------------------------------------------------------------------------------------------------------------------------------------------------------------------------------------------------------------------------------------|------------------------------------------------------------------------------------------------------------------------------------------------------------------------------|-----------------------------------------------------------------------------------------------------------------------------------------------------------------------------------------------------------------------------------------------------------------------------------------------------------------------------------------------------------------------------------------------------------------------------------------|
|    |                                  |                      | Inoculation with LPS (1 <sup>st</sup> ), inoculation with <i>E. coli</i> (2 <sup>nd</sup> ). | 72h or 240h (1 <sup>st</sup> ), 24h (2 <sup>nd</sup> ) | Group 1: Two-challenges<br>Group 2: One-challenge                                                                                                                                                                                                                                            | IRAK3 mRNA expression                                                                                                                                                        | Not estimable                                                                                                                                                                                                                                                                                                                                                                                                                           |
| 21 | Rothschild <i>et al.</i> (2017)  | Mice (n = 3-4)       | 3-5% DSS dissolved in tap water for a period of 5d followed by 2d of regular drinking water  | 7d                                                     | Group 1: IRAK3 knockout<br>Group 2: IRAK3 wildtype                                                                                                                                                                                                                                           | IL-6 protein expression                                                                                                                                                      | Not estimable                                                                                                                                                                                                                                                                                                                                                                                                                           |
| 22 | Shao <i>et al.</i> (2011)        | C57BL/6 mice (n = 3) | Injection with LPS (0.1-0.5 µg/g)                                                            | 1h<br><br>6h<br>24h<br><br>1h<br>6h<br>24h             | Group 1: One-challenge<br>Group 2: Control<br><br>Group 1: One-challenge<br>Group 2: Control<br>Group 1: One-challenge<br>Group 2: Control<br><br>Group 1: One-challenge<br>Group 2: Control<br>Group 1: One-challenge<br>Group 2: Control<br><br>Group 1: One-challenge<br>Group 2: Control | TNF-α protein expression<br><br>TNF-α protein expression<br>TNF-α protein expression<br><br>TNF-α protein expression<br>TNF-α protein expression<br>TNF-α protein expression | (Positive favours one-challenge)<br>TNF-α protein expression: 2.43 (-0.41, 5.27)<br>TNF-α protein expression: 0.00 (-0.16, 0.16)<br>(Negative favours control)<br>TNF-α protein expression: -0.35 (-1.99, 1.28)<br>(Positive favours one-challenge)<br>TNF-α protein expression: 9.10 (0.17, 18.03)<br>(Positive favours one-challenge)<br>TNF-α protein expression: 1.14 (-0.80, 3.08)<br>TNF-α protein expression: 0.00 (-1.60, 1.60) |
| 23 | Szatanik <i>et al.</i> (2011)    | BALB/c mice (n = 6)  | Injection with 5x10 <sup>6</sup> CFU of <i>N. meningitides</i>                               | 2h, 6h, 24h                                            | Group 1: One-challenge group<br>Group 2: lack of control                                                                                                                                                                                                                                     | TNF-α and IL-6 protein expression                                                                                                                                            | Not estimable                                                                                                                                                                                                                                                                                                                                                                                                                           |
| 24 | Takebayashi <i>et al.</i> (2009) | IQI/Jic mice (n = 6) | Intraperitoneal administration with 0.3 – 0.4 mg LPS                                         | 2h - 3h                                                | Group 1: One-challenge<br>Group 2: Control                                                                                                                                                                                                                                                   | IRAK3 mRNA expression                                                                                                                                                        | Not estimable                                                                                                                                                                                                                                                                                                                                                                                                                           |
| 25 | Tan <i>et al.</i> (2019)         | Wistar rats          | Injection with LPS (0.4 mg/rat)                                                              | 4h                                                     | Group 1: One-challenge<br>Group 2: Control                                                                                                                                                                                                                                                   | TNF-α protein expression                                                                                                                                                     | (Positive favours one-challenge)                                                                                                                                                                                                                                                                                                                                                                                                        |

|    |                                    |                             |                                                               |                                                                              |                                                                                                                                                                                                                                                                                                                                                                                |                                                                                                                                                                                                                                                                                               |                                                                                                                                                                                                                                                                                                                                                                                                                                                                                                                                                                                                                                          |
|----|------------------------------------|-----------------------------|---------------------------------------------------------------|------------------------------------------------------------------------------|--------------------------------------------------------------------------------------------------------------------------------------------------------------------------------------------------------------------------------------------------------------------------------------------------------------------------------------------------------------------------------|-----------------------------------------------------------------------------------------------------------------------------------------------------------------------------------------------------------------------------------------------------------------------------------------------|------------------------------------------------------------------------------------------------------------------------------------------------------------------------------------------------------------------------------------------------------------------------------------------------------------------------------------------------------------------------------------------------------------------------------------------------------------------------------------------------------------------------------------------------------------------------------------------------------------------------------------------|
|    |                                    |                             |                                                               | 16h                                                                          |                                                                                                                                                                                                                                                                                                                                                                                |                                                                                                                                                                                                                                                                                               | TNF- $\alpha$ protein expression: 8.22 (6.67, 9.77)<br>(Positive favours one-challenge)<br>TNF- $\alpha$ protein expression: 11.33 (9.24, 13.41)                                                                                                                                                                                                                                                                                                                                                                                                                                                                                         |
| 26 | Tseng <i>et al.</i> (2020)         | Sprague-Dawley rats (n = 6) | Injection with LPS (10 mg/kg)                                 | 24h                                                                          | Group 1: One-challenge<br>Group 2: Control                                                                                                                                                                                                                                                                                                                                     | TNF- $\alpha$ protein expression<br><br>IL-6 protein expression                                                                                                                                                                                                                               | (Positive favours one-challenge)<br>TNF- $\alpha$ protein expression: 3.81 (1.64, 5.99)<br>(Positive favours one-challenge)<br>IL-6 protein expression: 5.75 (2.73, 8.78)                                                                                                                                                                                                                                                                                                                                                                                                                                                                |
| 27 | van der Windt <i>et al.</i> (2012) | C57BL/6 mice (n = 8)        | Inoculation with $5 \times 10^4$ CFUs of <i>S. pneumoniae</i> | 3h<br><br>24h<br><br>3h<br><br>24h<br><br>3h<br><br>24h<br><br>3h<br><br>24h | Group 1: One-challenge<br>Group 2: Control<br><br>Group 1: One-challenge<br>Group 2: Control<br><br>Group 1: One-challenge<br>Group 2: Control<br><br>Group 1: One-challenge<br>Group 2: Control<br><br>Group 1: IRAK3 knockout<br>Group 2: IRAK3 wildtype<br><br>Group 1: IRAK3 knockout<br>Group 2: IRAK3 wildtype<br><br>Group 1: IRAK3 knockout<br>Group 2: IRAK3 wildtype | TNF- $\alpha$ protein expression<br><br>TNF- $\alpha$ protein expression<br><br>IL-6 protein expression<br><br>IL-6 protein expression<br><br>TNF- $\alpha$ protein expression<br><br>TNF- $\alpha$ protein expression<br><br>TNF- $\alpha$ protein expression<br><br>IL-6 protein expression | (Positive favours one-challenge)<br>TNF- $\alpha$ protein expression: 1.17 (0.08, 2.25)<br>(Positive favours one-challenge)<br>TNF- $\alpha$ protein expression: 1.42 (0.29, 2.55)<br>(Positive favours one-challenge)<br>IL-6 protein expression: 3.60 (1.86, 5.35)<br>(Positive favours one-challenge)<br>IL-6 protein expression: 1.22 (0.13, 2.32)<br>(Positive favours IRAK3 knockout)<br>TNF- $\alpha$ protein expression: 0.13 (-0.85, 1.11)<br>(Positive favours IRAK3 knockout)<br>TNF- $\alpha$ protein expression: 0.88 (-0.90, 1.06)<br><br>(Positive favours IRAK3 knockout)<br>IL-6 protein expression: 0.13 (-0.85, 1.11) |

|    |                            |                       |                                                                                                                                                |                                                           |                                                                                                             |                                                                                                       |                                                                                                                                                                                                                                                                       |
|----|----------------------------|-----------------------|------------------------------------------------------------------------------------------------------------------------------------------------|-----------------------------------------------------------|-------------------------------------------------------------------------------------------------------------|-------------------------------------------------------------------------------------------------------|-----------------------------------------------------------------------------------------------------------------------------------------------------------------------------------------------------------------------------------------------------------------------|
|    |                            |                       |                                                                                                                                                |                                                           | Group 1: IRAK3 knockout<br>Group 2: IRAK3 wildtype                                                          | IL-6 protein expression                                                                               | (Negative favours IRAK3 wildtype)<br>IL-6 protein expression: -0.09 (-1.07, 0.89)                                                                                                                                                                                     |
| 28 | Xia <i>et al.</i> (2018)   | C57BL/6 mice (n = 6)  | CLP (1 <sup>st</sup> ), injection with LPS (10 mg/kg) (2 <sup>nd</sup> )                                                                       | 3d (1 <sup>st</sup> ), 24h (2 <sup>nd</sup> )             | Group 1: Two-challenges<br>Group 2: One-challenge<br><br>Group 1: IRAK3 knockout<br>Group 2: IRAK3 wildtype | IRAK3 mRNA expression<br><br>TNF- $\alpha$ protein expression<br><br>TNF- $\alpha$ protein expression | (Positive favours two-challenge)<br>IRAK3 mRNA expression: 4.91 (2.26, 7.56)<br>(Negative favours one-challenge)<br>TNF- $\alpha$ protein expression: -2.84 (-4.63, 1.05)<br>(Positive favours IRAK3 knockout)<br>TNF- $\alpha$ protein expression: 2.33 (0.73, 3.94) |
| 29 | Xie <i>et al.</i> (2019)   | C57BL/6 mice (n = 10) | Injection with LPS (40 $\mu$ g/kg)                                                                                                             | 24h                                                       | Group 1: One-challenge<br>Group 2: Control                                                                  | TNF- $\alpha$ protein expression<br><br>IL-6 protein expression                                       | (Positive favours one-challenge)<br>TNF- $\alpha$ protein expression: 14.61 (9.48, 19.74)<br>(Positive favours one-challenge)<br>IL-6 protein expression: 8.02 (5.11, 10.92)                                                                                          |
| 30 | Xiong <i>et al.</i> (2011) | C57BL/6J mice (n = 3) | Inoculation with LPS (25 $\mu$ g/ mouse)<br><br>Inoculation with LPS (25 $\mu$ g/ mouse), macrophages extracted and treated with 100 ng/ml LPS | 24h<br><br>24h (1 <sup>st</sup> ), 3 h (2 <sup>nd</sup> ) | Group 1: One-challenge<br>Group 2: Control<br><br>Group 1: Two-challenges<br>Group 2: One-challenge         | IRAK3 mRNA expression<br><br>TNF- $\alpha$ mRNA expression                                            | (Positive favours one-challenge)<br>IRAK3 mRNA expression: 6.36 (0.01, 12.71)<br><br>Not estimable                                                                                                                                                                    |
| 31 | Yang and Zhao (2021)       | Rats (n = 12)         | Injection with LPS (3mg/kg)                                                                                                                    | 48h                                                       | Group 1: One-challenge<br>Group 2: Control                                                                  | TNF- $\alpha$ and IL-6 protein expression                                                             | (Positive favours one-challenge)<br>TNF- $\alpha$ protein expression: 3.78 (2.36, 5.20)<br>(Positive favours one-challenge)                                                                                                                                           |

|    |                            |                                  |                                                                                                                                                                    |                                                           |                                                                                                                                                                                                  |                                                                                                                                        |                                                                                                                                                                                                                                                                                                                                                            |
|----|----------------------------|----------------------------------|--------------------------------------------------------------------------------------------------------------------------------------------------------------------|-----------------------------------------------------------|--------------------------------------------------------------------------------------------------------------------------------------------------------------------------------------------------|----------------------------------------------------------------------------------------------------------------------------------------|------------------------------------------------------------------------------------------------------------------------------------------------------------------------------------------------------------------------------------------------------------------------------------------------------------------------------------------------------------|
|    |                            |                                  |                                                                                                                                                                    |                                                           |                                                                                                                                                                                                  |                                                                                                                                        | IL-6 protein expression: 3.31 (2.01, 4.61)                                                                                                                                                                                                                                                                                                                 |
| 32 | Yee and Hameman (2013)     | C57BL/6 mice                     | Injection with LPS (1 mg/kg)                                                                                                                                       | 2h<br>4h<br>2h<br>4h                                      | Group 1: One-challenge<br>Group 2: Control<br><br>Group 1: One-challenge<br>Group 2: Control<br><br>Group 1: One-challenge<br>Group 2: Control<br><br>Group 1: One-challenge<br>Group 2: Control | TNF- $\alpha$ protein expression<br><br>TNF- $\alpha$ protein expression<br><br>IL-6 protein expression<br><br>IL-6 protein expression | (Positive favours one-challenge)<br>TNF- $\alpha$ protein expression: 16.50 (11.06, 21.95)<br>(Positive favours one-challenge)<br>TNF- $\alpha$ protein expression: 8.02 (5.27, 10.76)<br>(Positive favours one-challenge)<br>IL-6 protein expression: 1.93 (0.88, 2.97)<br>(Positive favours one-challenge)<br>IL-6 protein expression: 3.45 (2.05, 4.85) |
| 33 | Yu <i>et al.</i> (2017)    | Wistar rats                      | Injection with LPS (200 $\mu$ g per mouse)<br><br>Daily injection with LPS (0.1 mg/kg LPS) (1 <sup>st</sup> ), on day 6 injection with LPS (200 $\mu$ g per mouse) | 24h<br><br>5d (1 <sup>st</sup> ), 24h (2 <sup>nd</sup> ). | Group 1: One-challenge<br>Group 2: Control<br><br>Group 1: Two-challenges<br>Group 2: One-challenge                                                                                              | IRAK3 mRNA expression<br><br>IRAK3 protein expression                                                                                  | (Positive favours one-challenge)<br>IRAK3 mRNA expression: 4.78 (2.91, 6.66)<br><br>(Positive favours two-challenge)<br>IRAK3 protein expression: 3.03 (1.67, 4.40)                                                                                                                                                                                        |
| 34 | Zhang <i>et al.</i> (2020) | C57BL/6 mice (n = 6)             | CLP                                                                                                                                                                | 24h                                                       | Group 1: One-challenge<br>Group 2: Control                                                                                                                                                       | TNF- $\alpha$ protein expression                                                                                                       | (Positive favours one-challenge)<br>TNF- $\alpha$ protein expression: 4.28 (1.91, 6.66)                                                                                                                                                                                                                                                                    |
| 35 | Zhang and Wang (2021)      | Male Sprague-Dawley rats (n = 6) | 5.5% (w/v) dextran sodium sulfate-treated rats                                                                                                                     | 7d                                                        | Group 1: One-challenge<br>Group 2: Control                                                                                                                                                       | TNF- $\alpha$ and IL-6 protein expression                                                                                              | Not estimable                                                                                                                                                                                                                                                                                                                                              |
| 36 | Zhao <i>et al.</i> (2019)  | BALB/c mice (n = 11)             | Injection with LPS (10mg/kg)                                                                                                                                       | 2h<br><br>6h                                              | Group 1: One-challenge<br>Group 2: Control<br><br>Group 1: One-challenge<br>Group 2: Control                                                                                                     | TNF- $\alpha$ protein expression<br><br>TNF- $\alpha$ protein expression                                                               | (Positive favours one-challenge)<br>TNF- $\alpha$ protein expression: 2.36 (1.22, 3.50)<br>(Positive favours one-challenge)                                                                                                                                                                                                                                |

|    |                              |                         |                                |     |                                            |                                                                 |                                                                                                                                                                                       |
|----|------------------------------|-------------------------|--------------------------------|-----|--------------------------------------------|-----------------------------------------------------------------|---------------------------------------------------------------------------------------------------------------------------------------------------------------------------------------|
|    |                              |                         |                                | 2h  | Group 1: One-challenge<br>Group 2: Control | IL-6 protein expression                                         | TNF- $\alpha$ protein expression: 2.45<br>(1.29, 3.60)<br>(Positive favours one-challenge)                                                                                            |
|    |                              |                         |                                | 6h  | Group 1: One-challenge<br>Group 2: Control | IL-6 protein expression                                         | IL-6 protein expression: 3.24<br>(1.89, 4.59)<br>(Positive favours one-challenge)<br>IL-6 protein expression: 3.66<br>(2.21, 5.12)                                                    |
| 37 | Zhao <i>et al.</i><br>(2021) | BALB/c<br>mice (n = 10) | Injection with<br>LPS (2mg/kg) | 24h | Group 1: One-challenge<br>Group 2: Control | TNF- $\alpha$ protein expression<br><br>IL-6 protein expression | (Positive favours one-challenge)<br>TNF- $\alpha$ protein expression: 48.09<br>(31.44, 64.75)<br>(Positive favours one-challenge)<br>IL-6 protein expression: 48.50<br>(31.71, 65.30) |
